# Supplementary material
Source: Springer Nature journal article supplement (https://www.springermedizin.de/resource/supplementary/12865_2011_431_MOESM5_ESM.pdf/9427982)

Luciferase activity

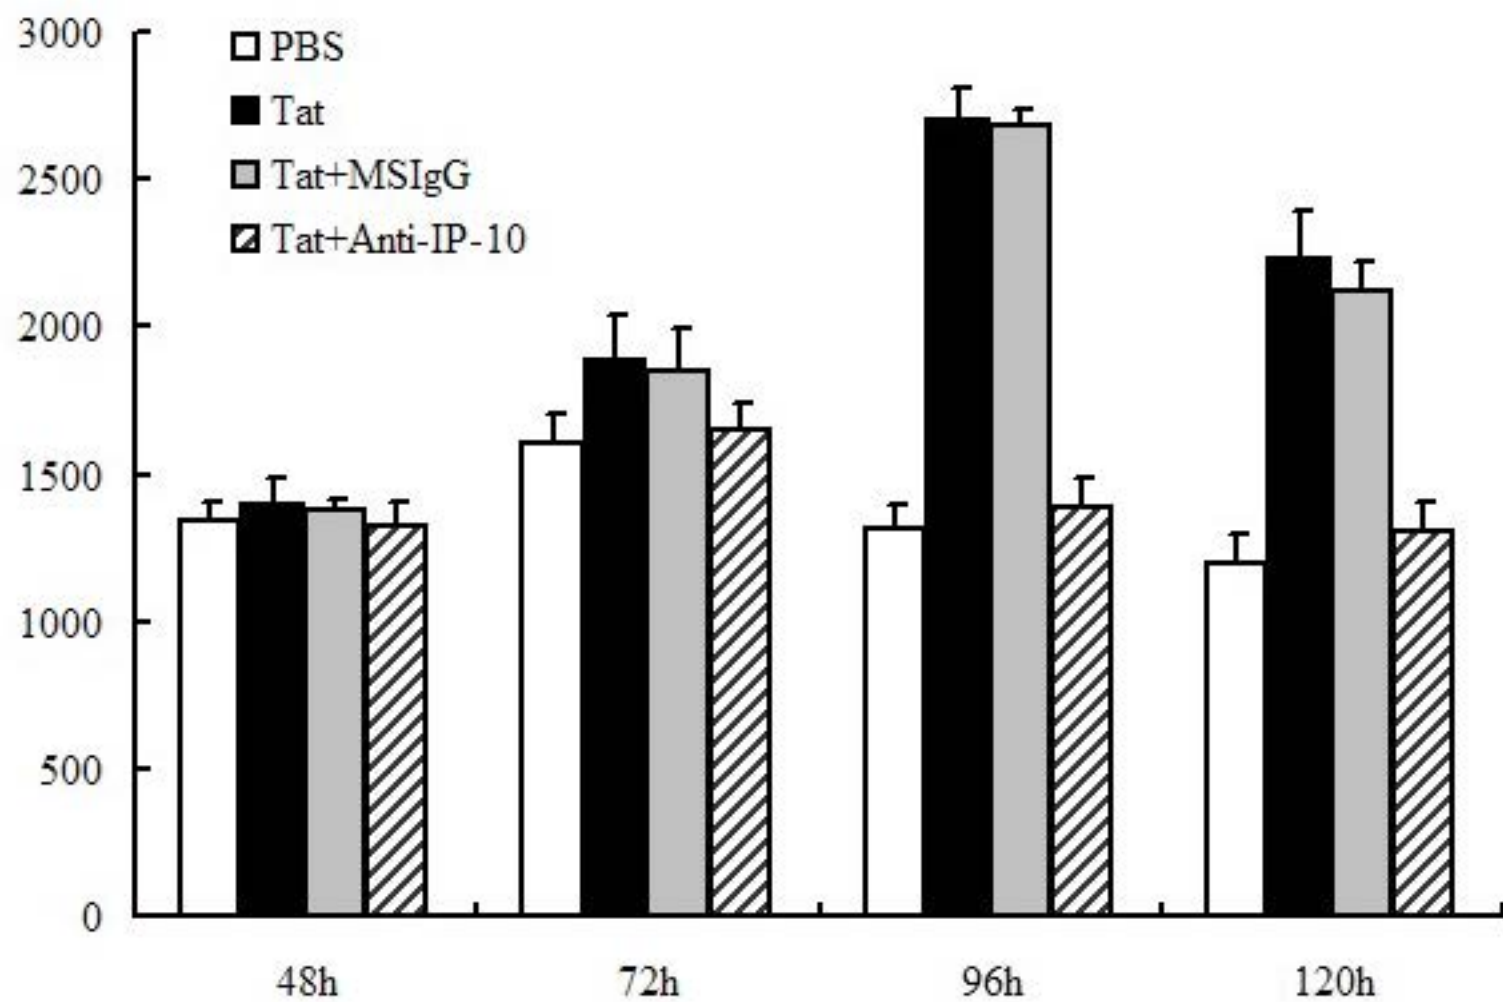

Supplement: MOESM5 [file 9427982]
